# Supplementary material
Source: PubMed Central journal article supplement (PMC4229863)
Supplement: Supp_Fig1.pdf [file Supp_Fig1.pdf]

## Supplementary Data

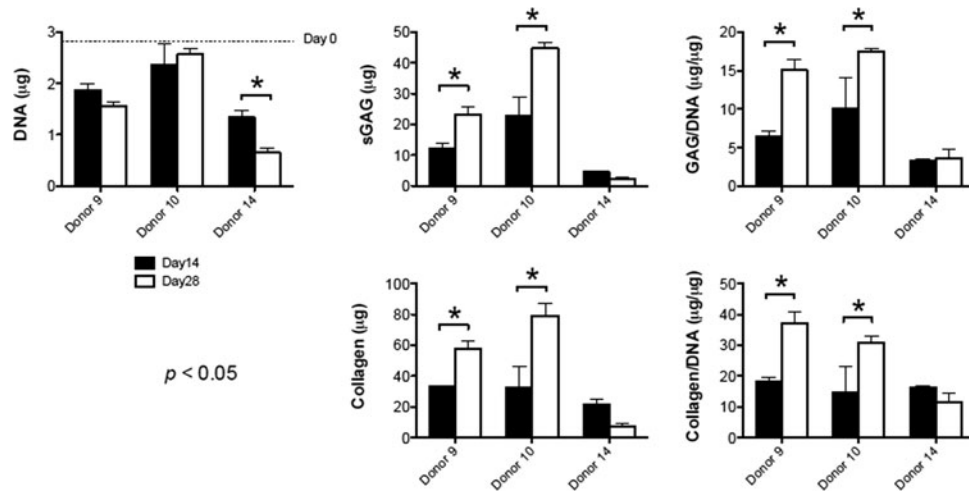

**SUPPLEMENTARY FIG. S1.** DNA, glycosaminoglycan (GAG), collagen, GAG/DNA, and collagen/DNA content of pellets generated using fat pad-derived stem cells isolated from three separate OA donors. \*indicates  $p < 0.05$ .
