# Supplementary material
Source: PubMed Central journal article supplement (PMC4229863)
Supplement: Supp_Fig2.pdf [file Supp_Fig2.pdf]

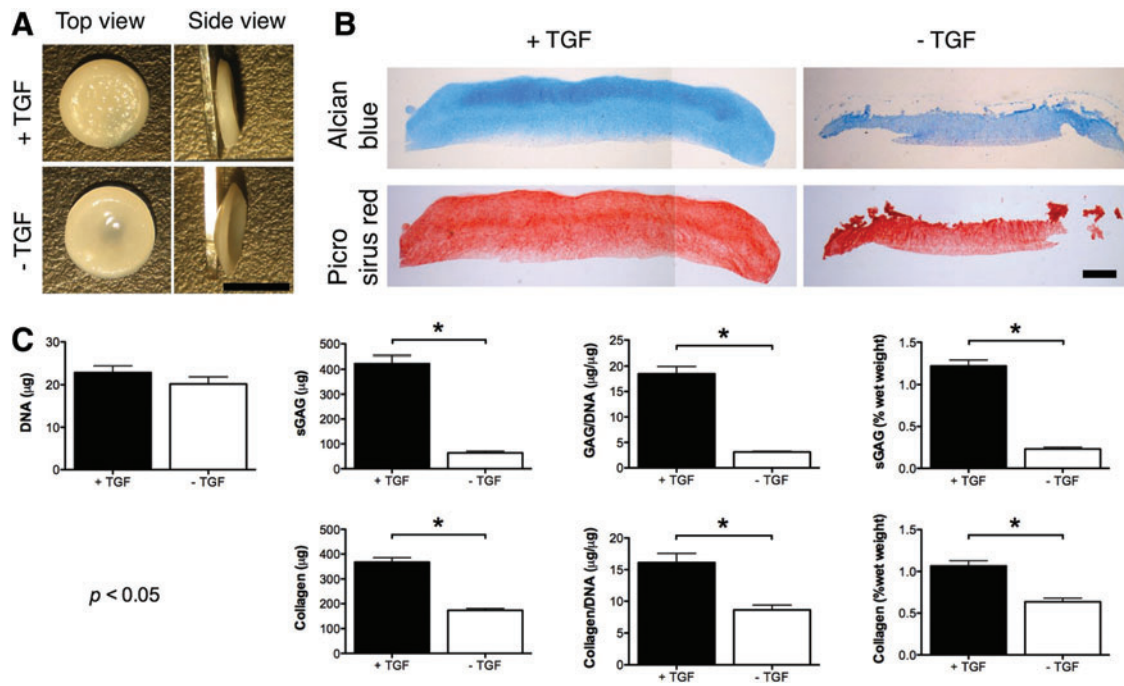

**SUPPLEMENTARY FIG. S2.** (A) Macroscopic image of tissues engineered on transwell inserts and either temporally ( $-$ TGF) or continuously ( $+$ TGF) supplemented with transforming growth factor- $\beta$ 3 (TGF- $\beta$ 3). Scale bar=5 mm. (B) Histological staining of engineered tissue for Alcian Blue and Picrosirius Red. Scale bar=500  $\mu\text{m}$ . (C) DNA, GAG, collagen, GAG/DNA, collagen/DNA, GAG (% wet weight [ww]), collagen (% ww) content of engineered tissues temporally ( $-$ TGF) or continuously ( $+$ TGF) supplemented with TGF- $\beta$ 3. \*indicates  $p < 0.05$ .
